# Supplementary material
Source: PubMed Central journal article supplement (PMC5177679)

**Figure e-1.** Flow diagram for the diagnostic accuracy of the random-forest classifier in people with multiple sclerosis and neuromyelitis optica.

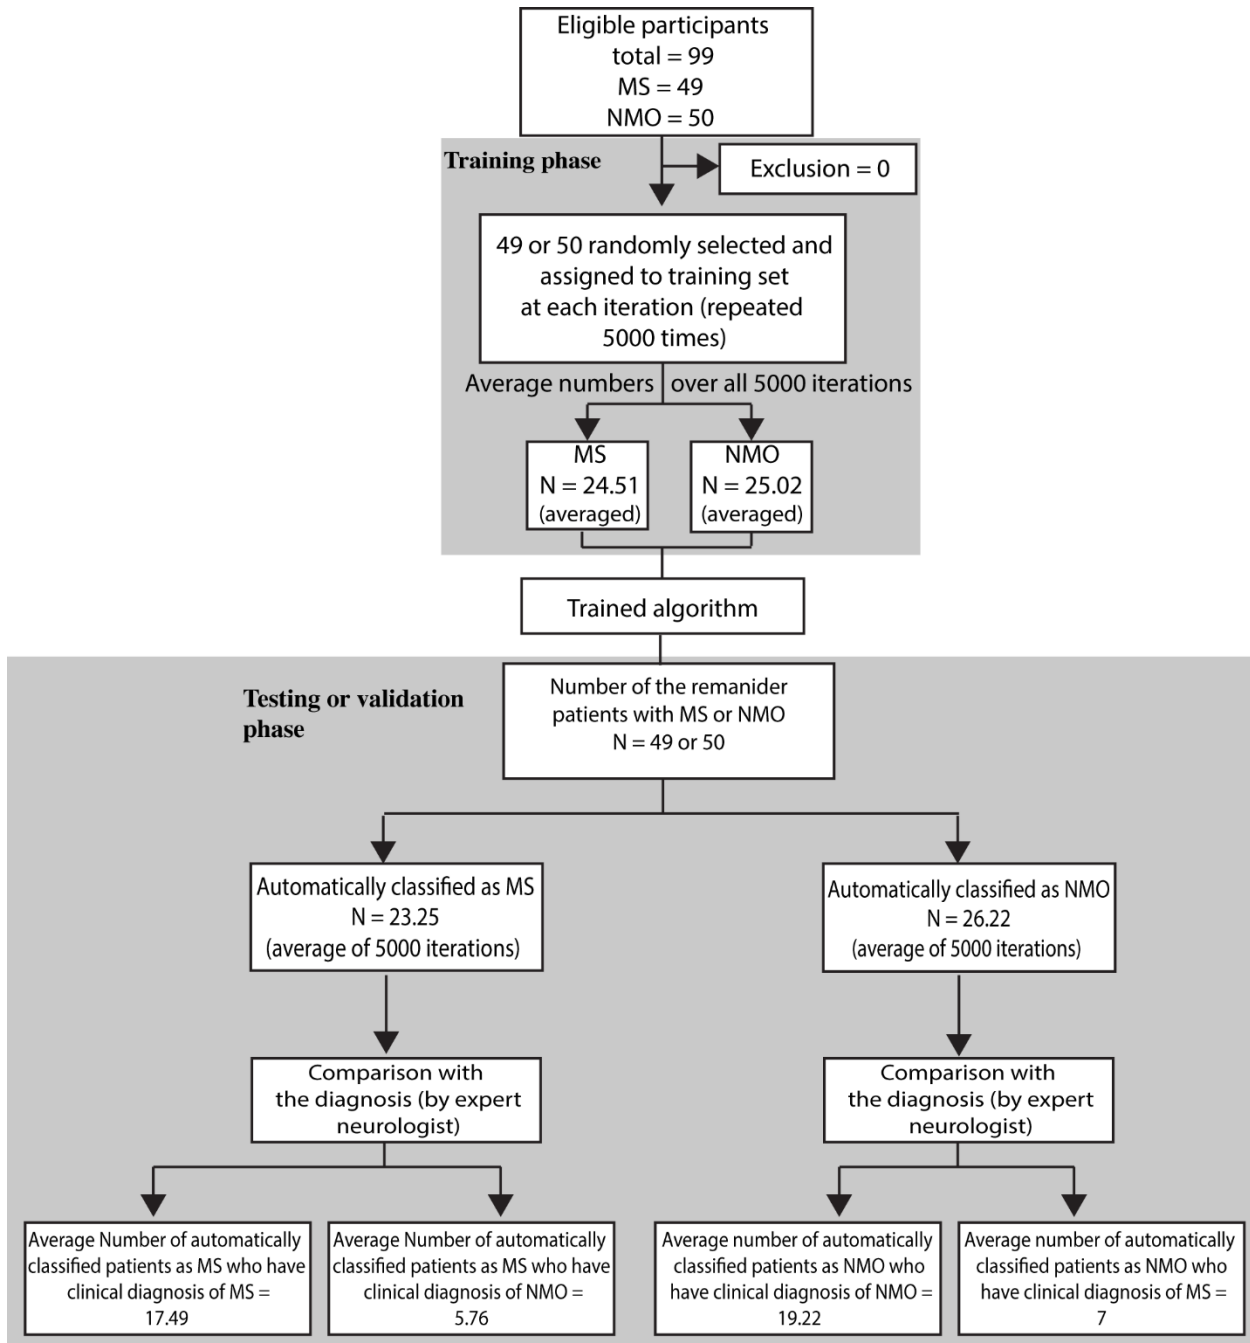

**Figure e-2.** Standardized lesion volume in people with multiple sclerosis and neuromyelitis optica.

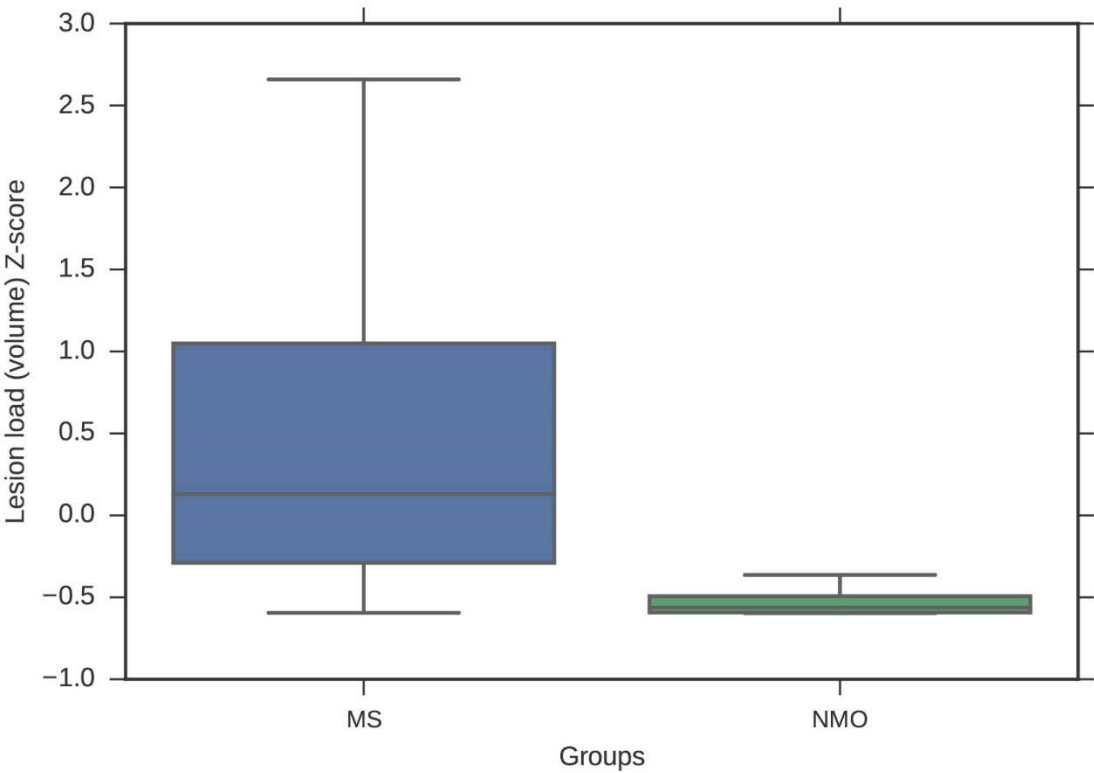

Supplement: supp_WNL.0000000000003395_e-figures.pdf [file supp_WNL.0000000000003395_e-figures.pdf]
