# Supplementary material
Source: PubMed Central journal article supplement (PMC5177679)
Supplement: supp_WNL.0000000000003395_Supplementary_tables.pdf [file supp_WNL.0000000000003395_Supplementary_tables.pdf]

**Supplementary tables:**

**Table e-1.** Imaging protocol for each cohort at Tehran and Padua

| Parameter                        | <b>Tehran</b>  | <b>Padua</b> |
|----------------------------------|----------------|--------------|
| Field strength                   | 3T             | 1.5T         |
| Head receiver coil               | 12 channel     | 16 channel   |
| <i><b>Sequence: T1</b></i>       |                |              |
| TR/TE                            | 2530 / 3.44 ms | 25/4.6 ms    |
| Voxel size                       | 1x1x1 mm       | 1x1x1 mm     |
| TI                               | 1100 ms        | 2500 ms      |
| FOV                              | 265 mm         | 250 mm       |
| <i><b>Sequence: T2/FLAIR</b></i> |                |              |
| TR/TE                            | 4000/91 ms     | 1000/120     |
| Slice thickness                  | 3 mm           | 3 mm         |
| FOV                              | 220 mm         | 250 mm       |
| Number of slices                 | 42             | 50           |

**Table e-2.** Disease modifying treatments for each centre

|                          | Italy         |              | Iran          |              |
|--------------------------|---------------|--------------|---------------|--------------|
|                          | NMO<br>(N=20) | MS<br>(N=24) | NMO<br>(N=30) | MS<br>(N=25) |
| No treatment             | 7             | 3            | 4             | 5            |
| Treatments:              |               |              |               |              |
| Cyclophosphamide         | 6             | –            | 1             | –            |
| Rituximab                | 3             | –            | –             | –            |
| Azathioprine             | 3             | –            | 18            | 2            |
| Methotrexate             | 1             | –            | 1             | –            |
| Mitoxantrone             | –             | –            | 1             | 1            |
| Interferon beta          | –             | 14           | –             | 17           |
| mycophenolate<br>mofetil | –             | –            | 5             | –            |
| Fingolimod               | –             | 4            | –             | –            |
| Natalizumab              | –             | 2            | –             | –            |
| Copaxone                 | –             | 1            | –             | –            |
